# Supplementary material
Source: HighWire-hosted journal article supplement (https://bmjopen.bmj.com/content/15/2/e089784)
Supplement: inline-supplementary-material-1 [file inline-supplementary-material-1.pdf]

**Manuscript Title:** Hepatic and renal functions of paediatric patients with thalassaemia: a cross-sectional study from two large thalassaemia centres in Sri Lanka

**Supplemental Table 1 – Assay methods and instruments used for each biochemical test**

| Biochemical test                    | Assay method                                                | Instrument used | Lower limit of detection |
|-------------------------------------|-------------------------------------------------------------|-----------------|--------------------------|
| Aspartate transaminases (AST) (U/L) | IFCC recommended colorimetric method                        | MINDRAY BS 800  | 5 U/L                    |
| Alanine transaminases (ALT) (U/L)   | IFCC recommended colorimetric method                        | MINDRAY BS 800  | 5 U/L                    |
| Albumin (g/dL)                      | Bromocresol green colorimetric method                       | MINDRAY BS 800  | 2 g/L                    |
| Globulin (g/dL)                     | Calculated                                                  | MINDRAY BS 800  | -                        |
| Gamma-GT                            | Szasz method                                                | BECKMAN AU450   | 3 U/L                    |
| Total bilirubin (µmol/L)            | Colorimetric diazo method                                   | BECKMAN AU450   | 2.5 µmol/L               |
| Direct bilirubin (µmol/L)           | Colorimetric diazo method                                   | BECKMAN AU450   | 1.4 µmol/L               |
| Indirect bilirubin (µmol/L)         | Calculated                                                  | BECKMAN AU450   | -                        |
| Alkaline phosphatase (ALP) (U/L)    | Colorimetric assay in accordance with a standardized method | MINDRAY BS 800  | 5 U/L                    |
| Ferritin                            | Two-site immunoenzymometric assay                           | VITROS 5600     | 3.0 ng/mL                |
| Urine protein: creatinine (mg/mmol) | Turbidimetric method                                        | BECKMAN AU450   | -                        |
| Serum creatinine (µmol/L)           | Enzymatic method - creatininase                             | MINDRAY BS 800  | 5 µmol/L                 |
| Blood urea (mg/dL)                  | Kinetic test with urease and glutamate dehydrogenase        | MINDRAY BS 800  | 3.0 mg/dL                |
| Na+ (mmol/L)                        | Ion-Selective Electrode indirect                            | VITROS 4600     | 80 mmol/L                |
| K+ (mmol/L)                         | Ion-Selective Electrode indirect                            | VITROS 4600     | 1.5 mmol/L               |

Supplemental Table 2 – Details of patients with eGFR <60mL/min

| No. | eGFR (mL/min) | Age | Sex    | Type of thalassaemia | Transfusion dependency    | Ferritin (ng/mL) | Pre-transfusion haemoglobin (g/dL) | Iron chelator              |
|-----|---------------|-----|--------|----------------------|---------------------------|------------------|------------------------------------|----------------------------|
| 1   | 55            | 5   | Male   | HbE β-thalassaemia   | Non-transfusion dependent | 175              | 6.27                               | None                       |
| 2   | 57            | 3   | Female | β-thalassaemia major | Transfusion-dependent     | 1262             | 9.30                               | Deferoxamine + Deferasirox |
